# Supplementary figures and images for: Patterns of Extrathoracic Metastasis in Lung Cancer Patients
Source: MDPI journal article supplement (doi:10.3390/curroncol29110691), 2022-11-16

N-MAC

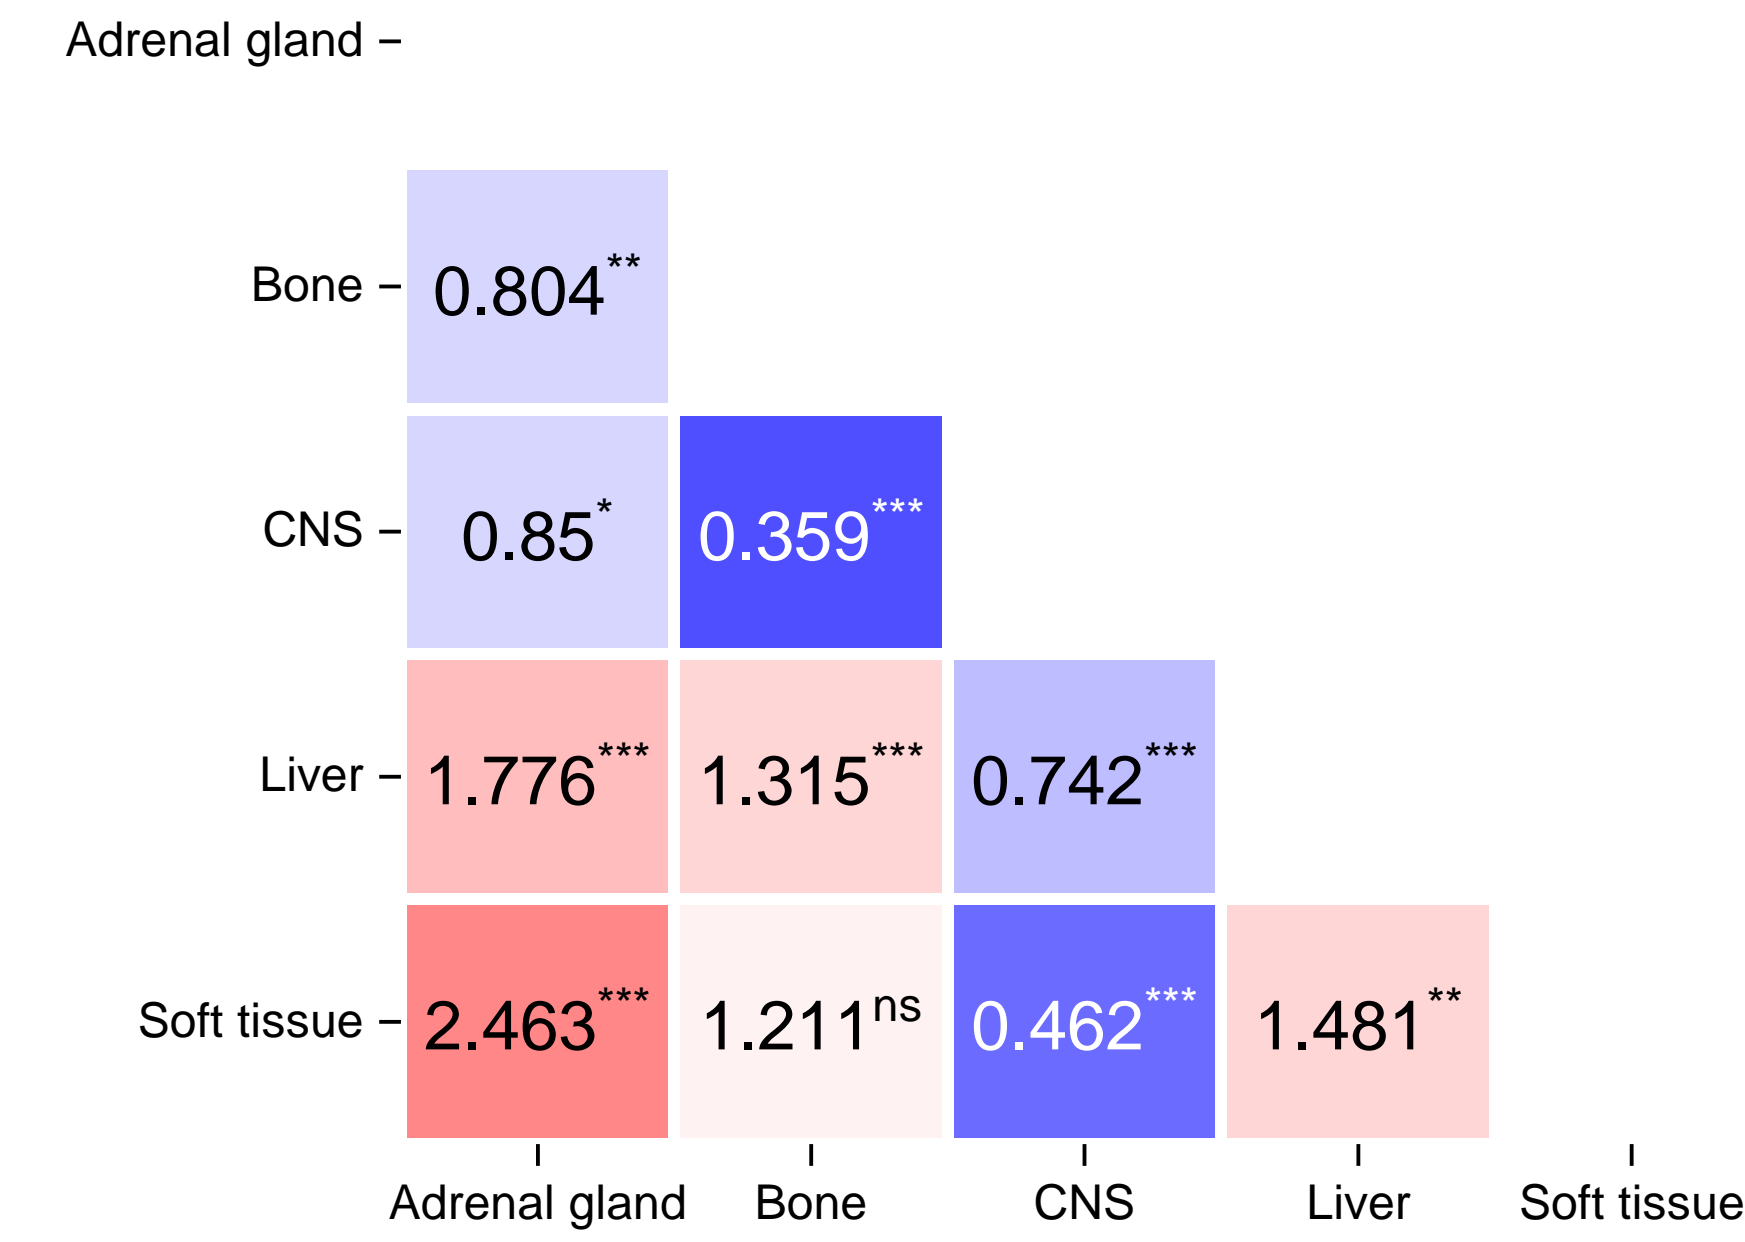

MAC

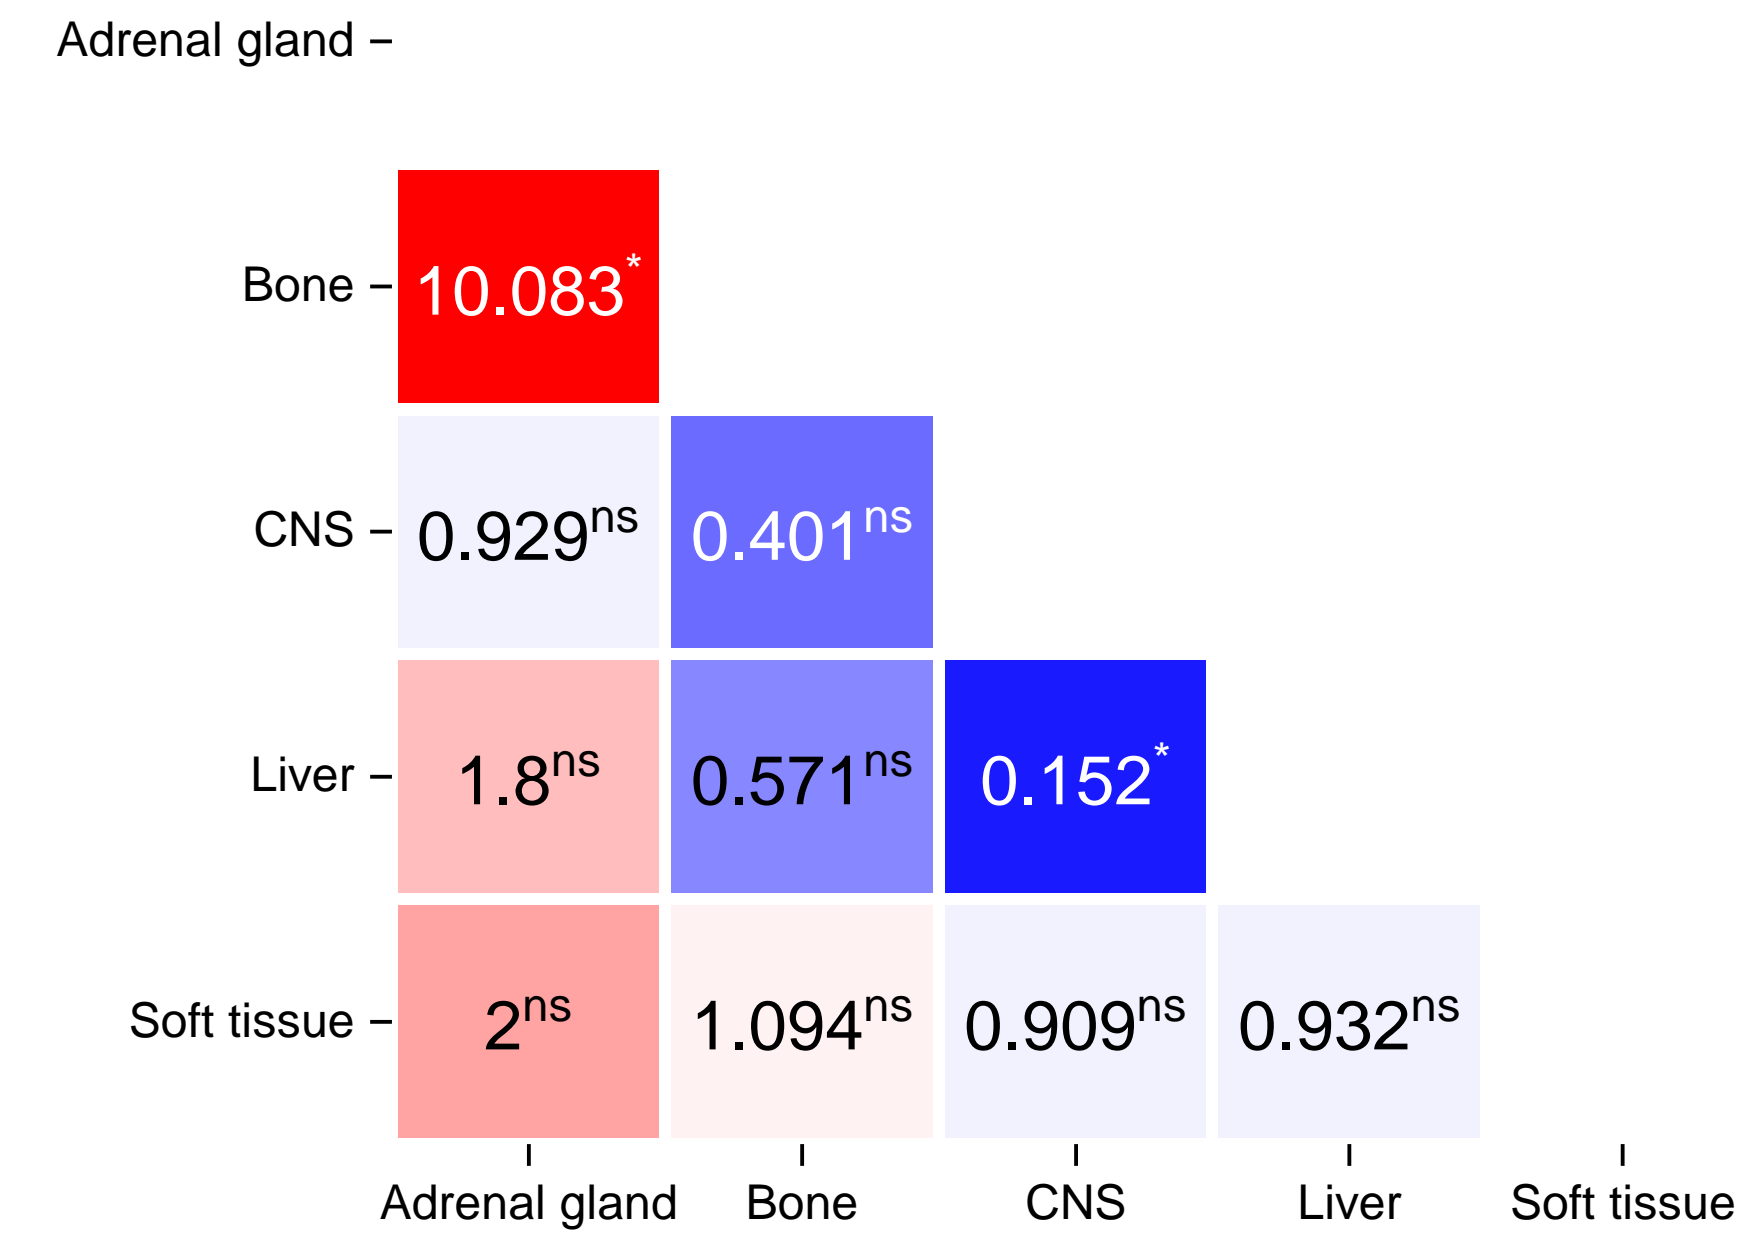

SCC

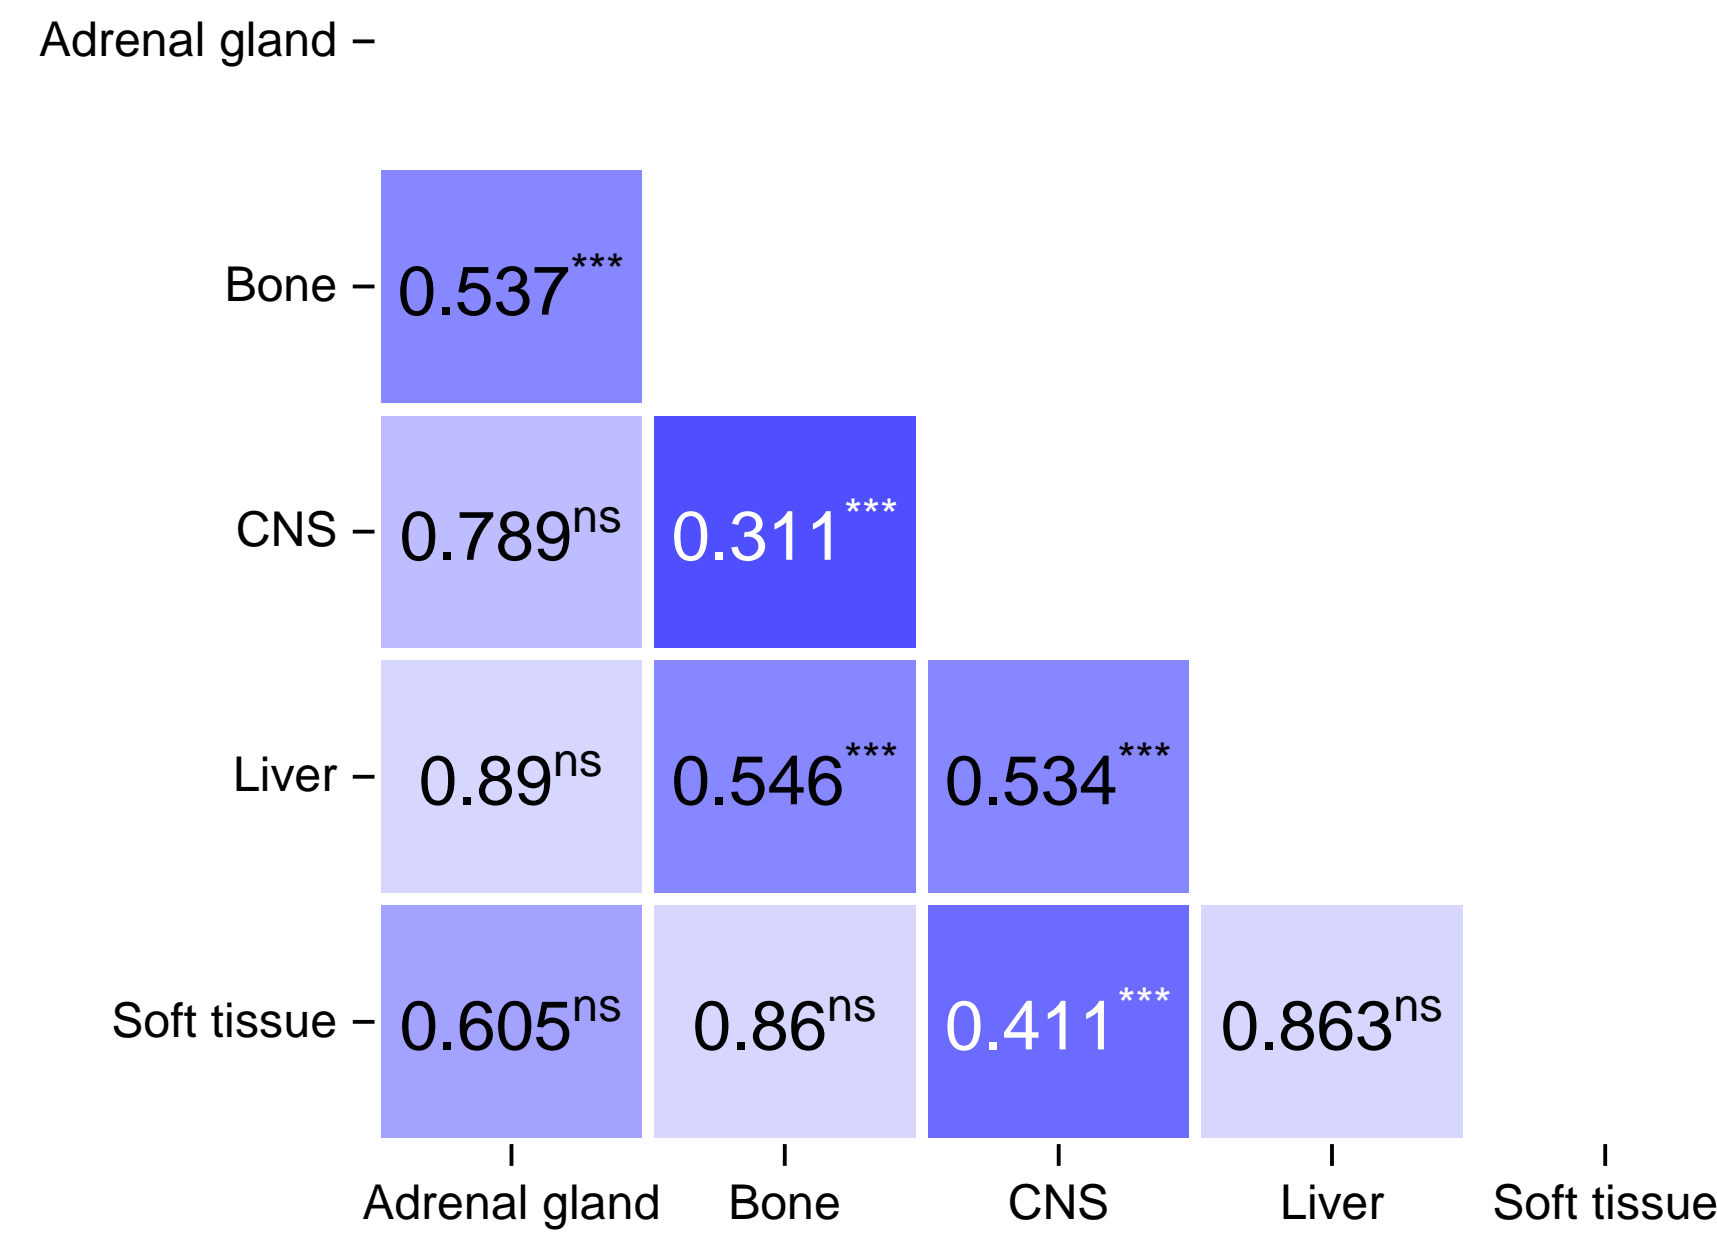

ASC

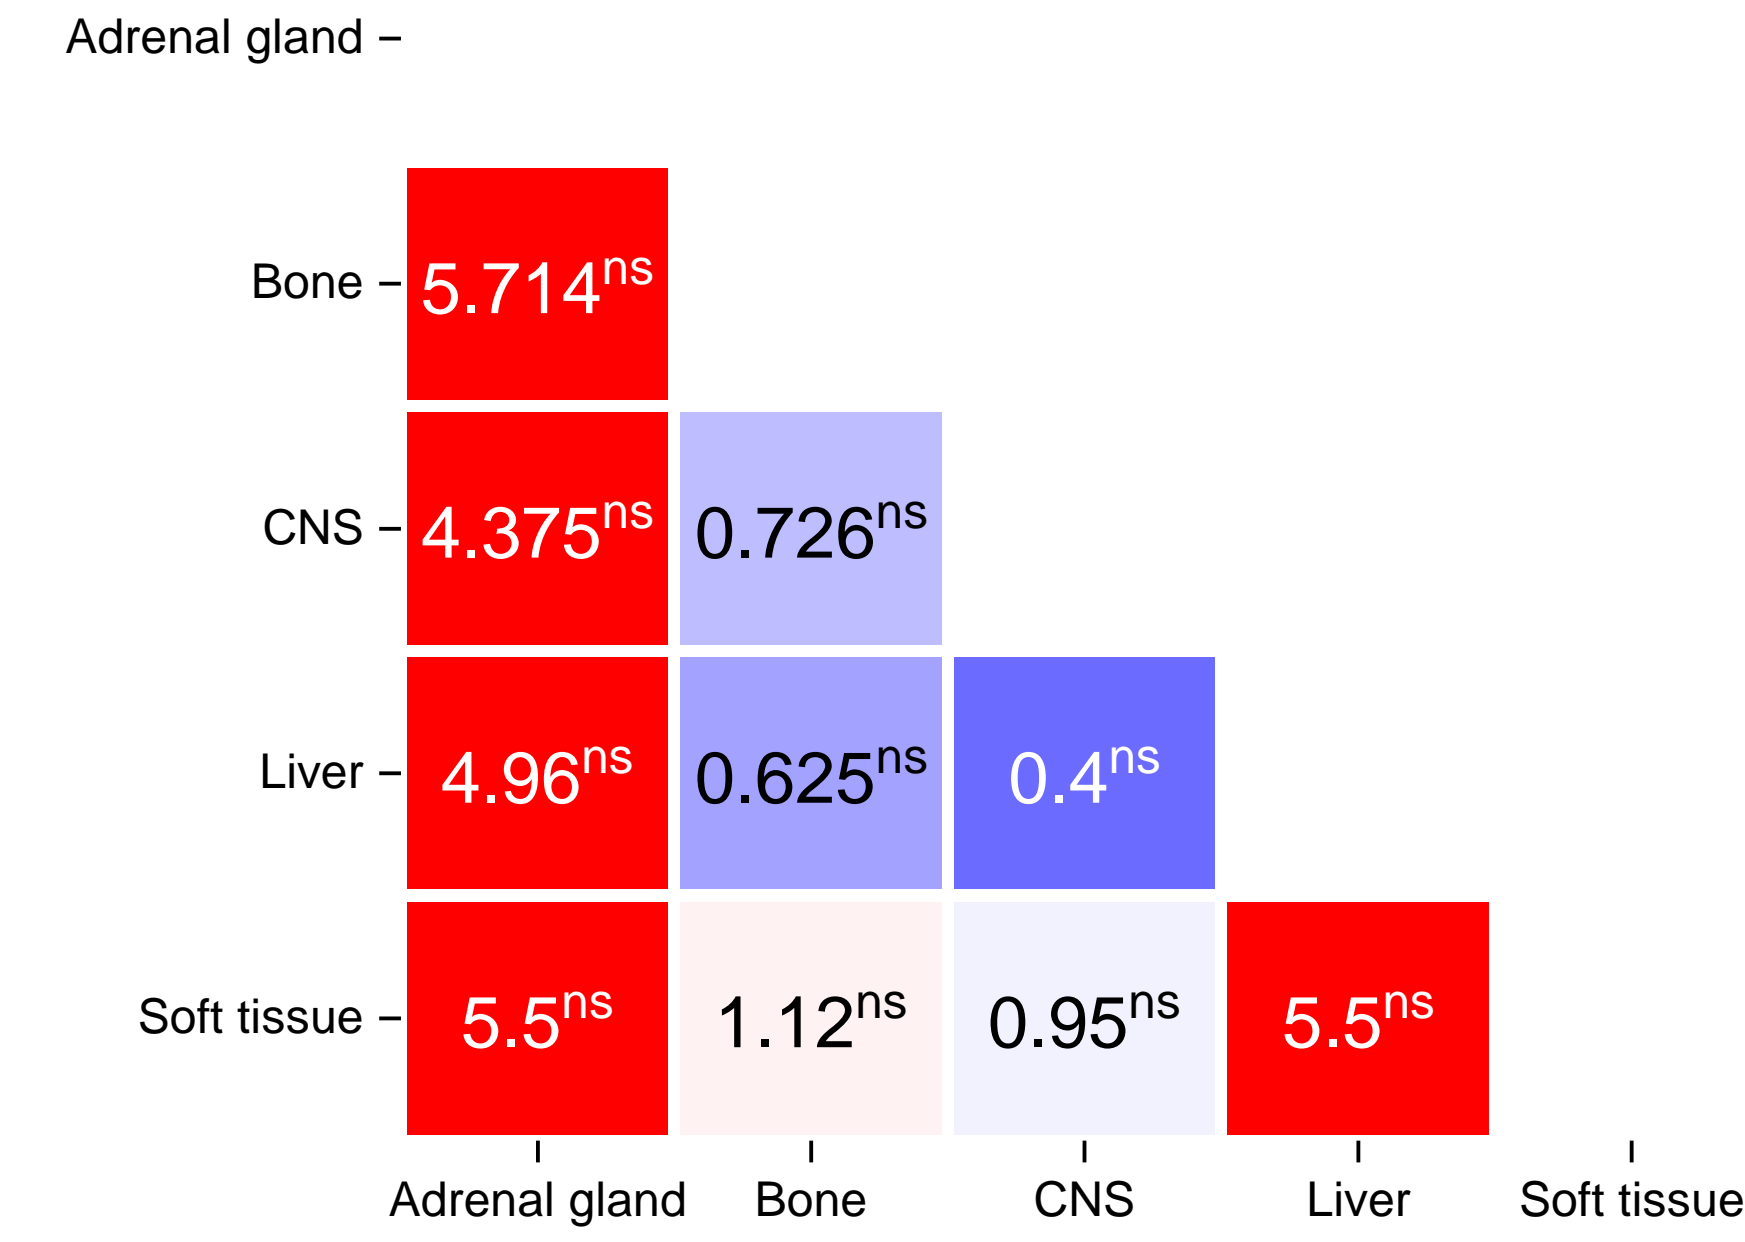

SGC

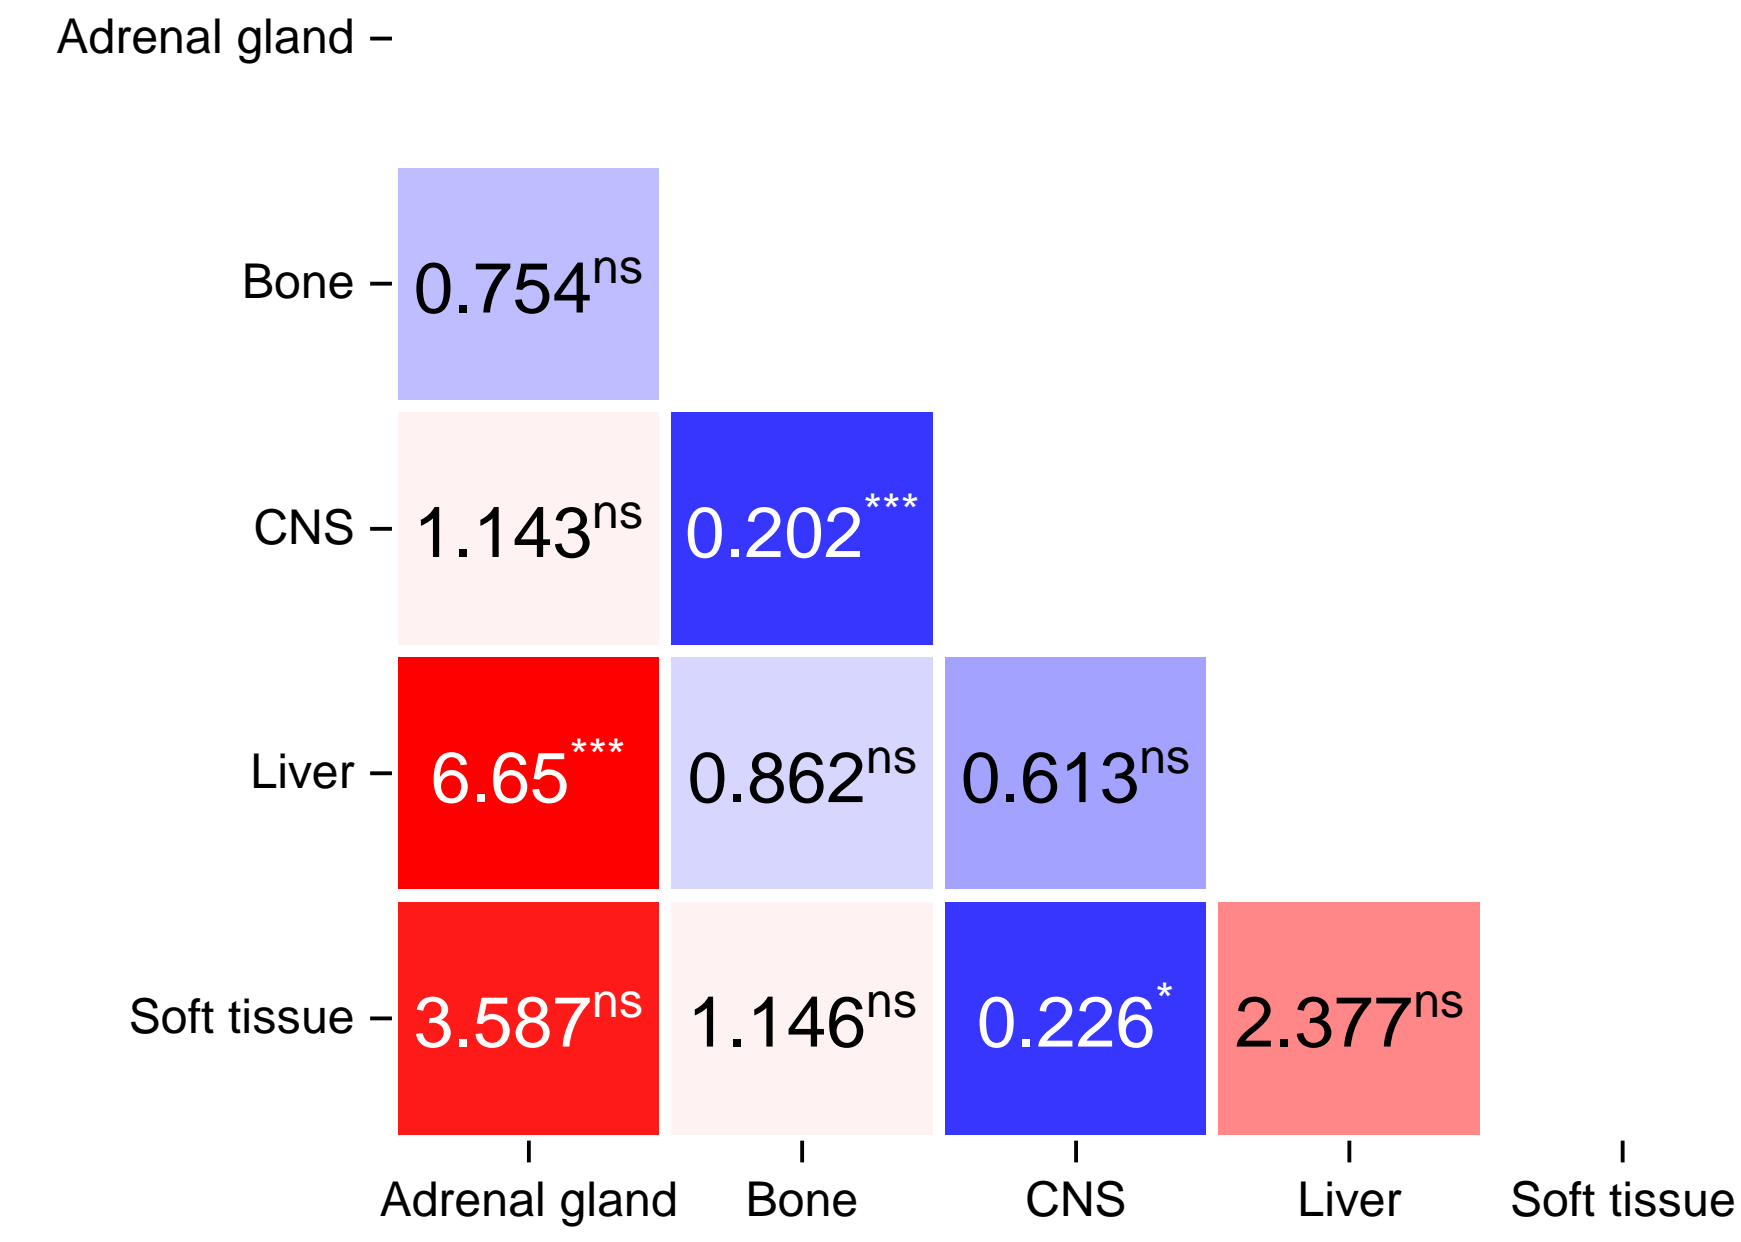

SC

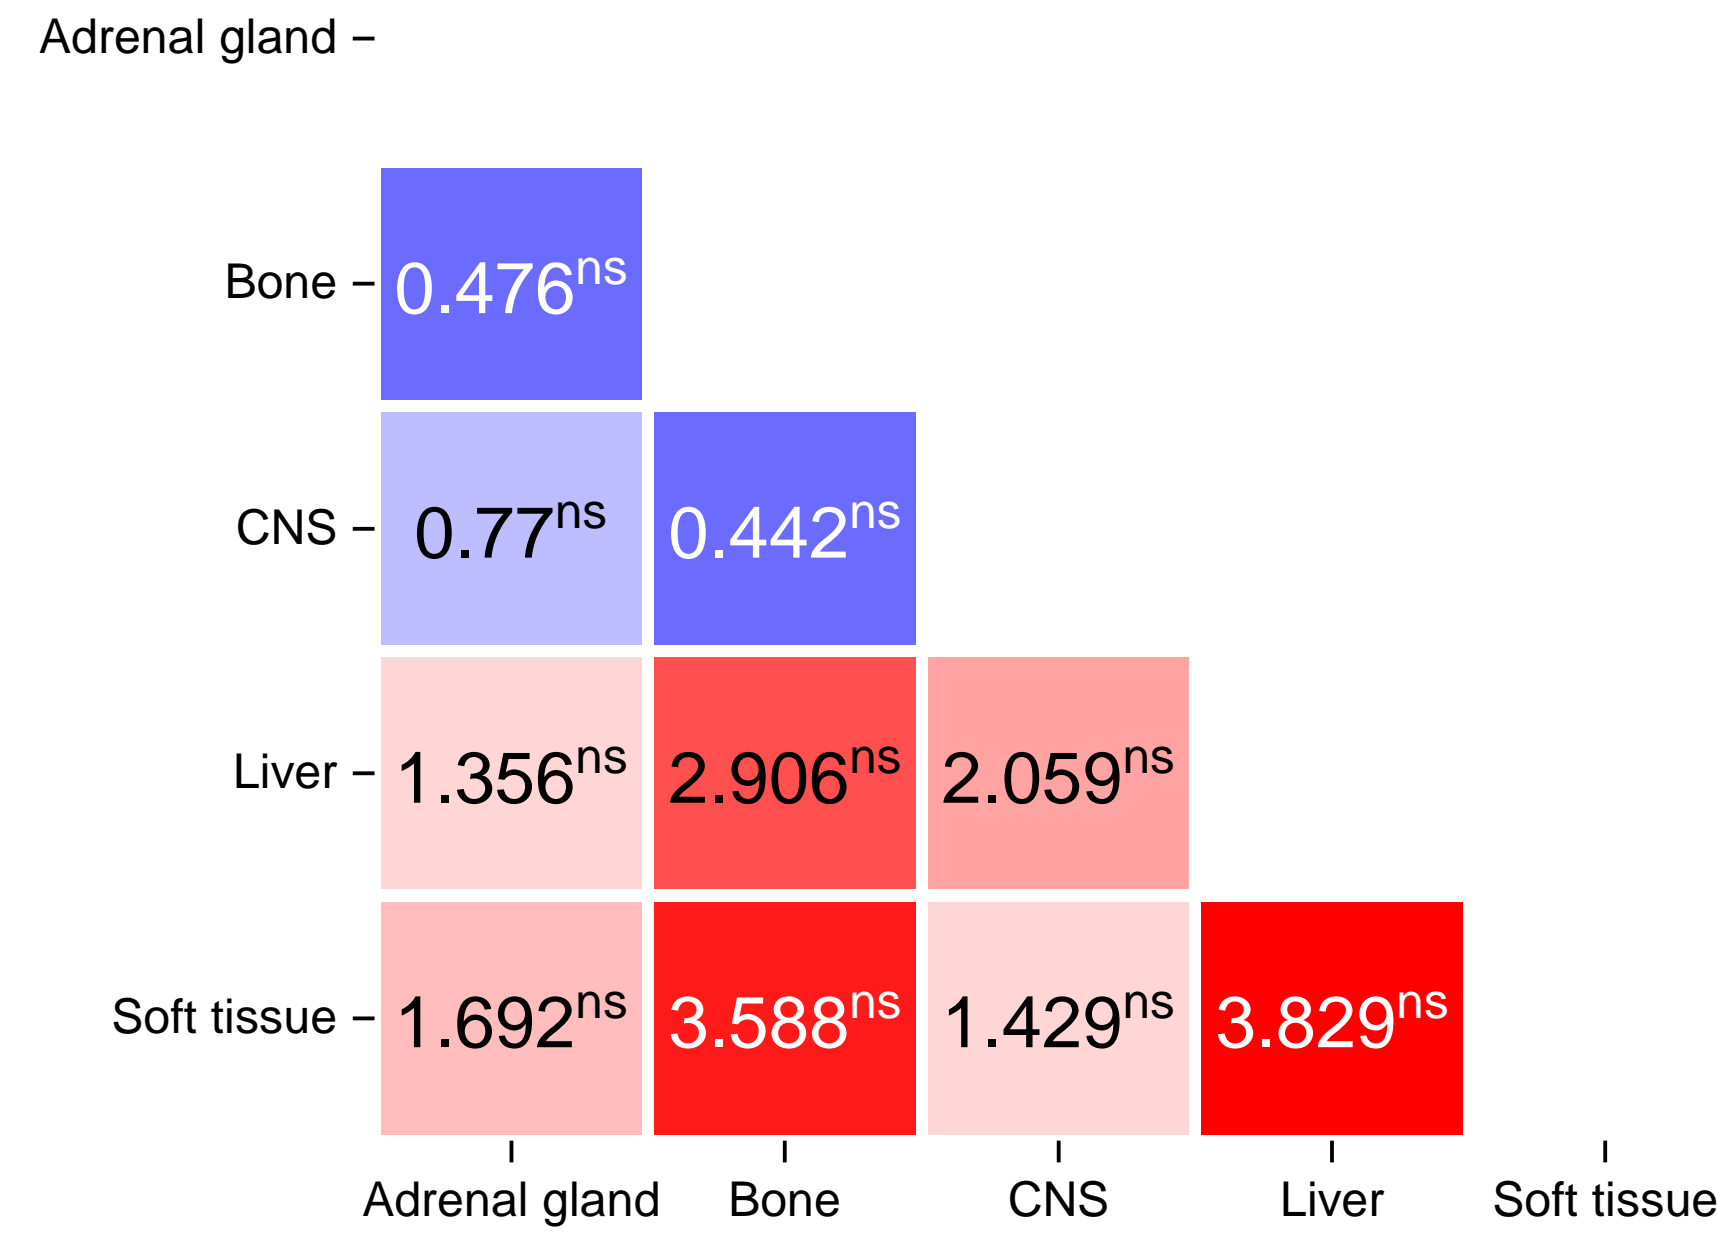

NSCLC, NOS

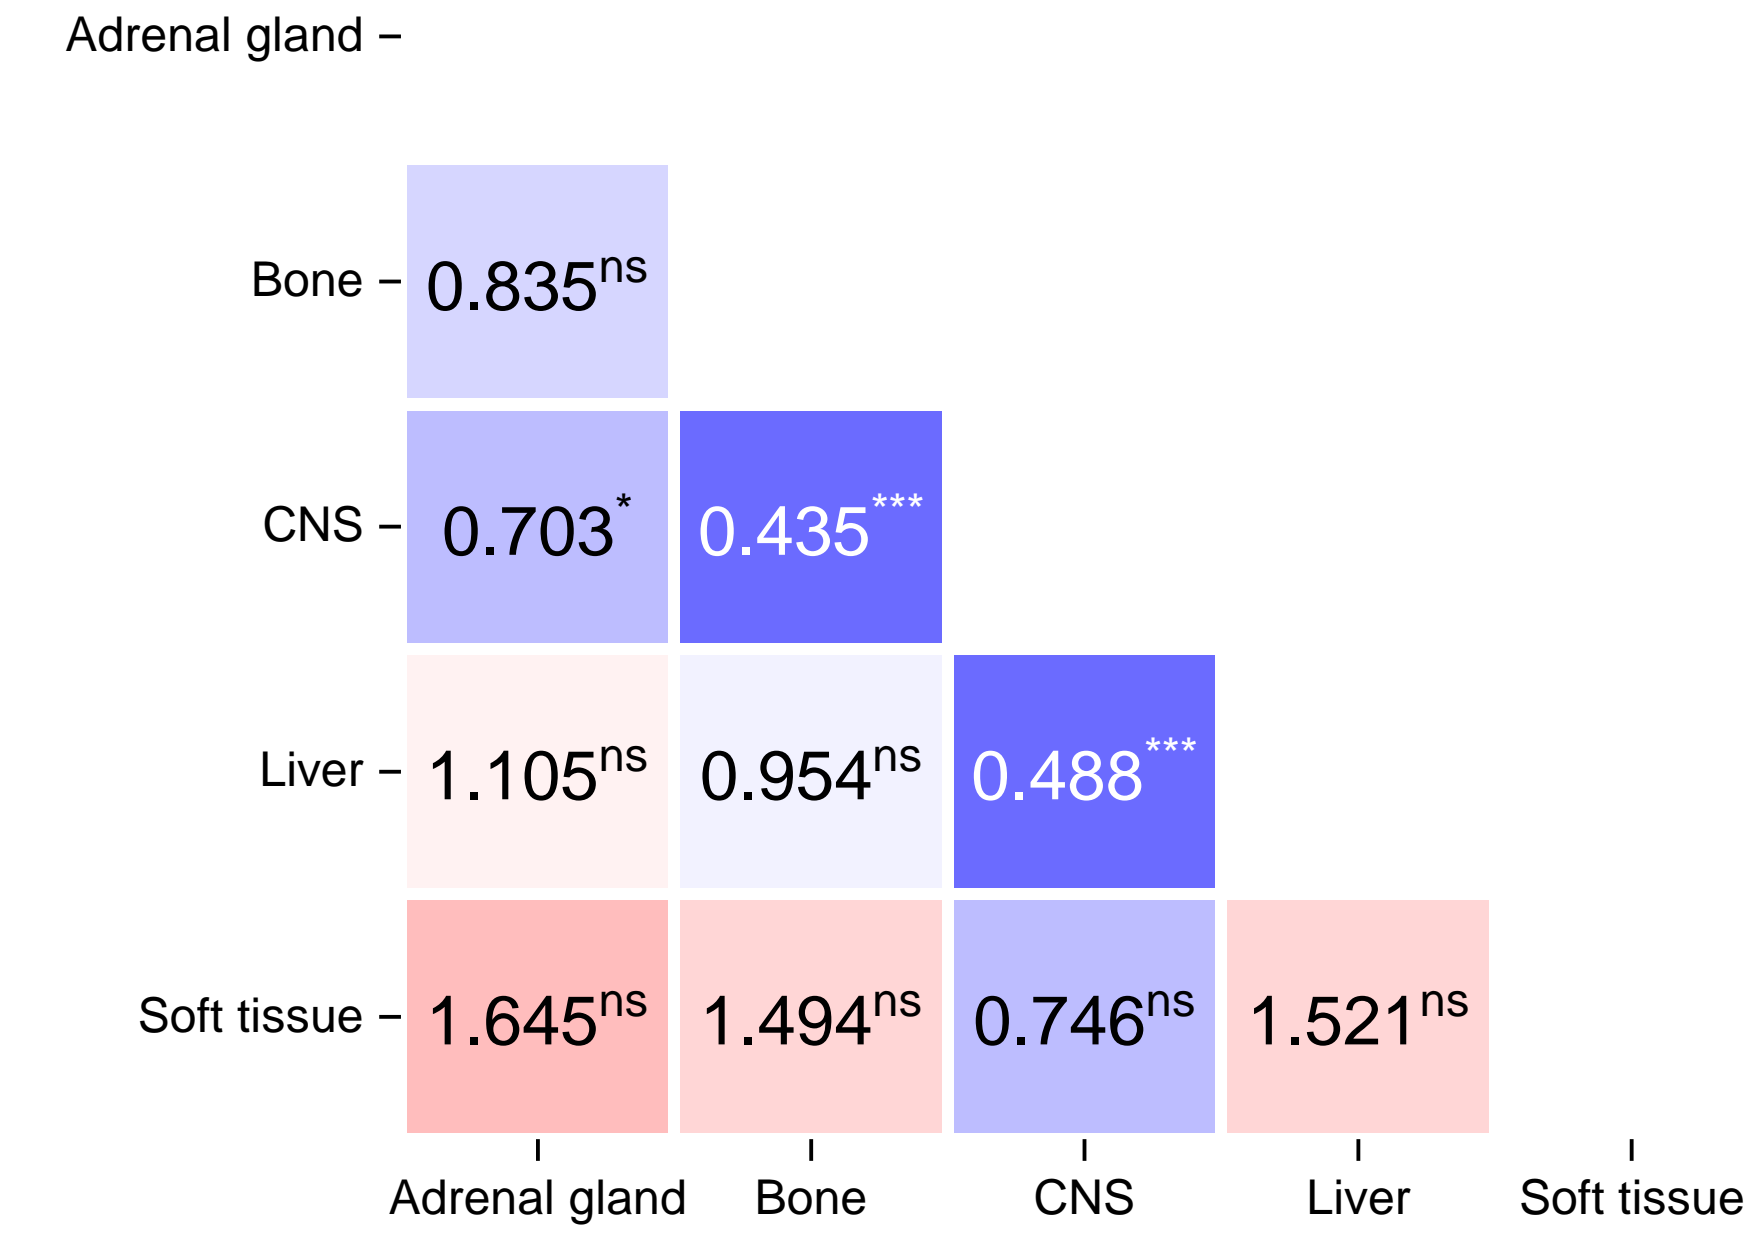

SCLC

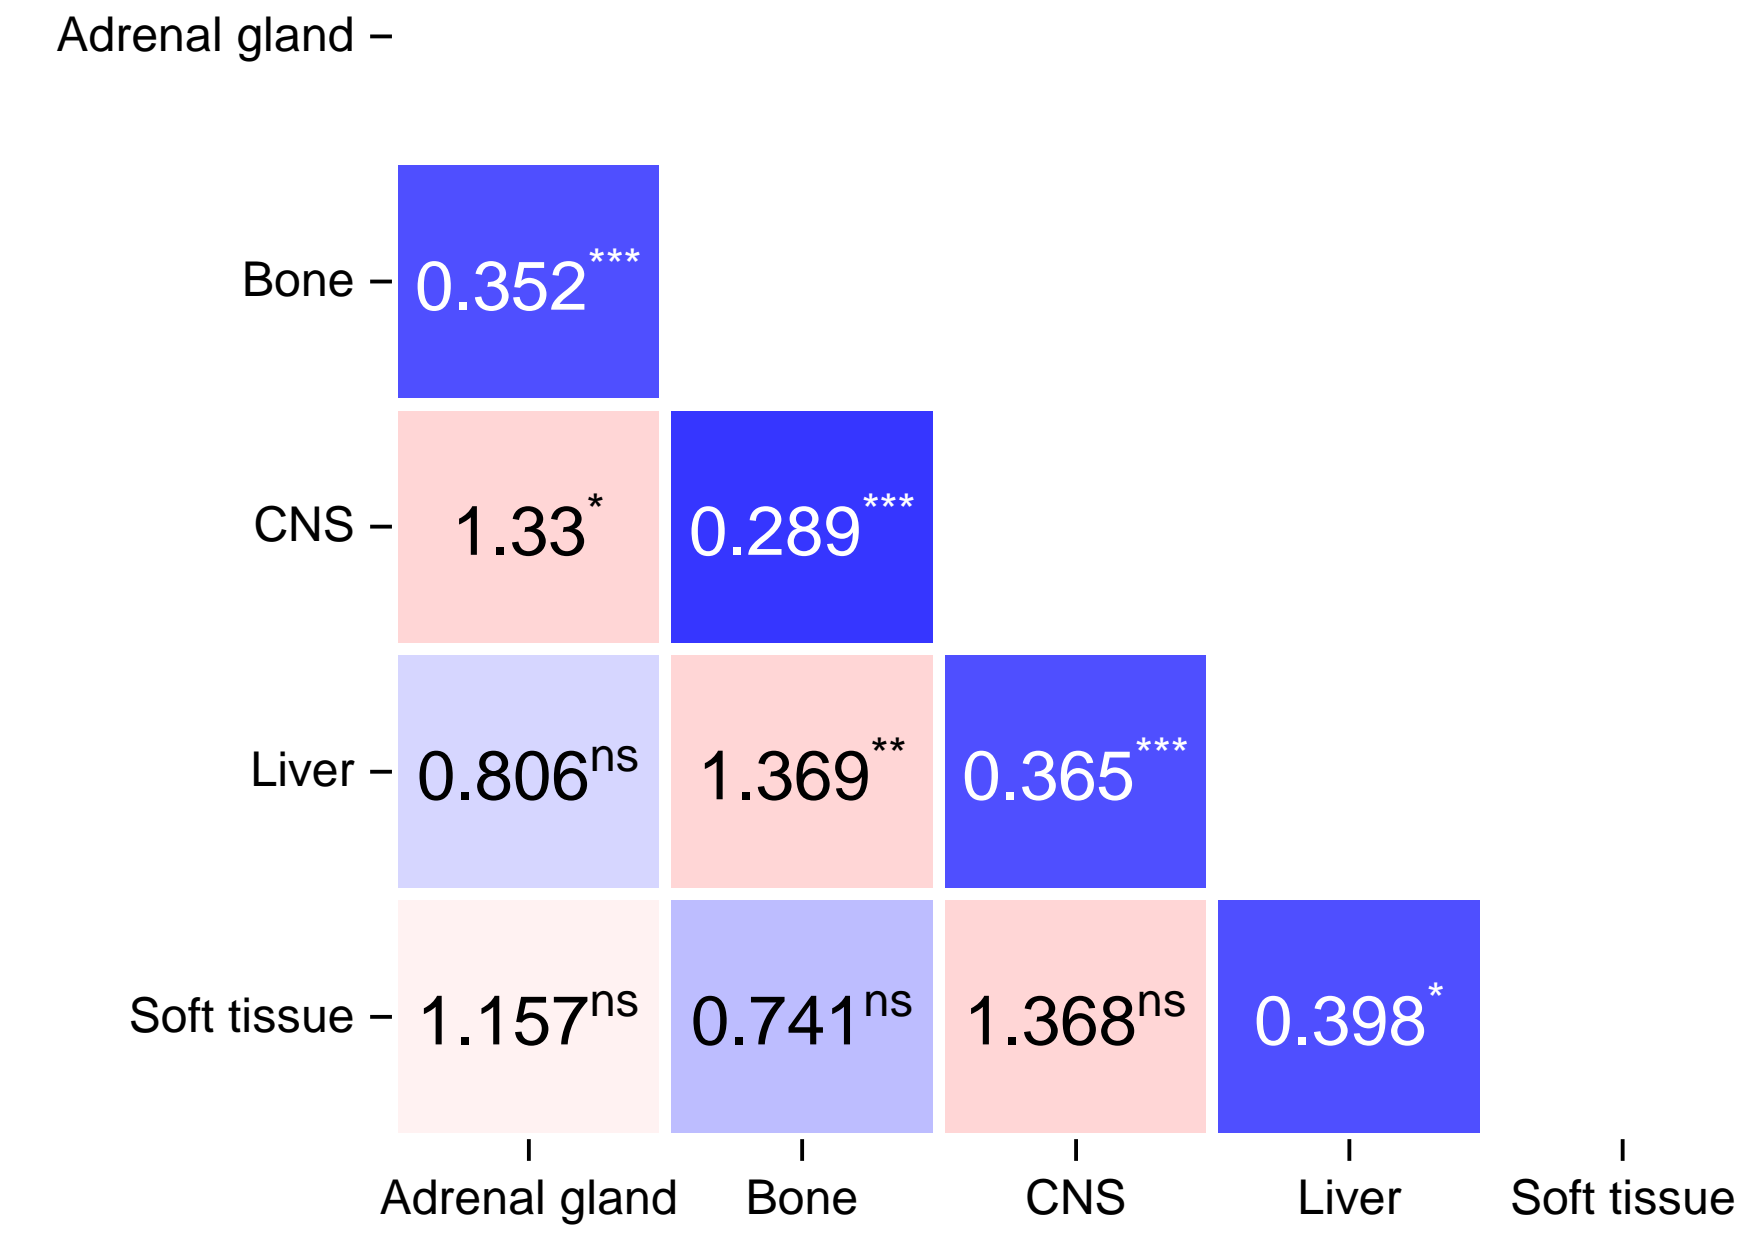

LCNEC

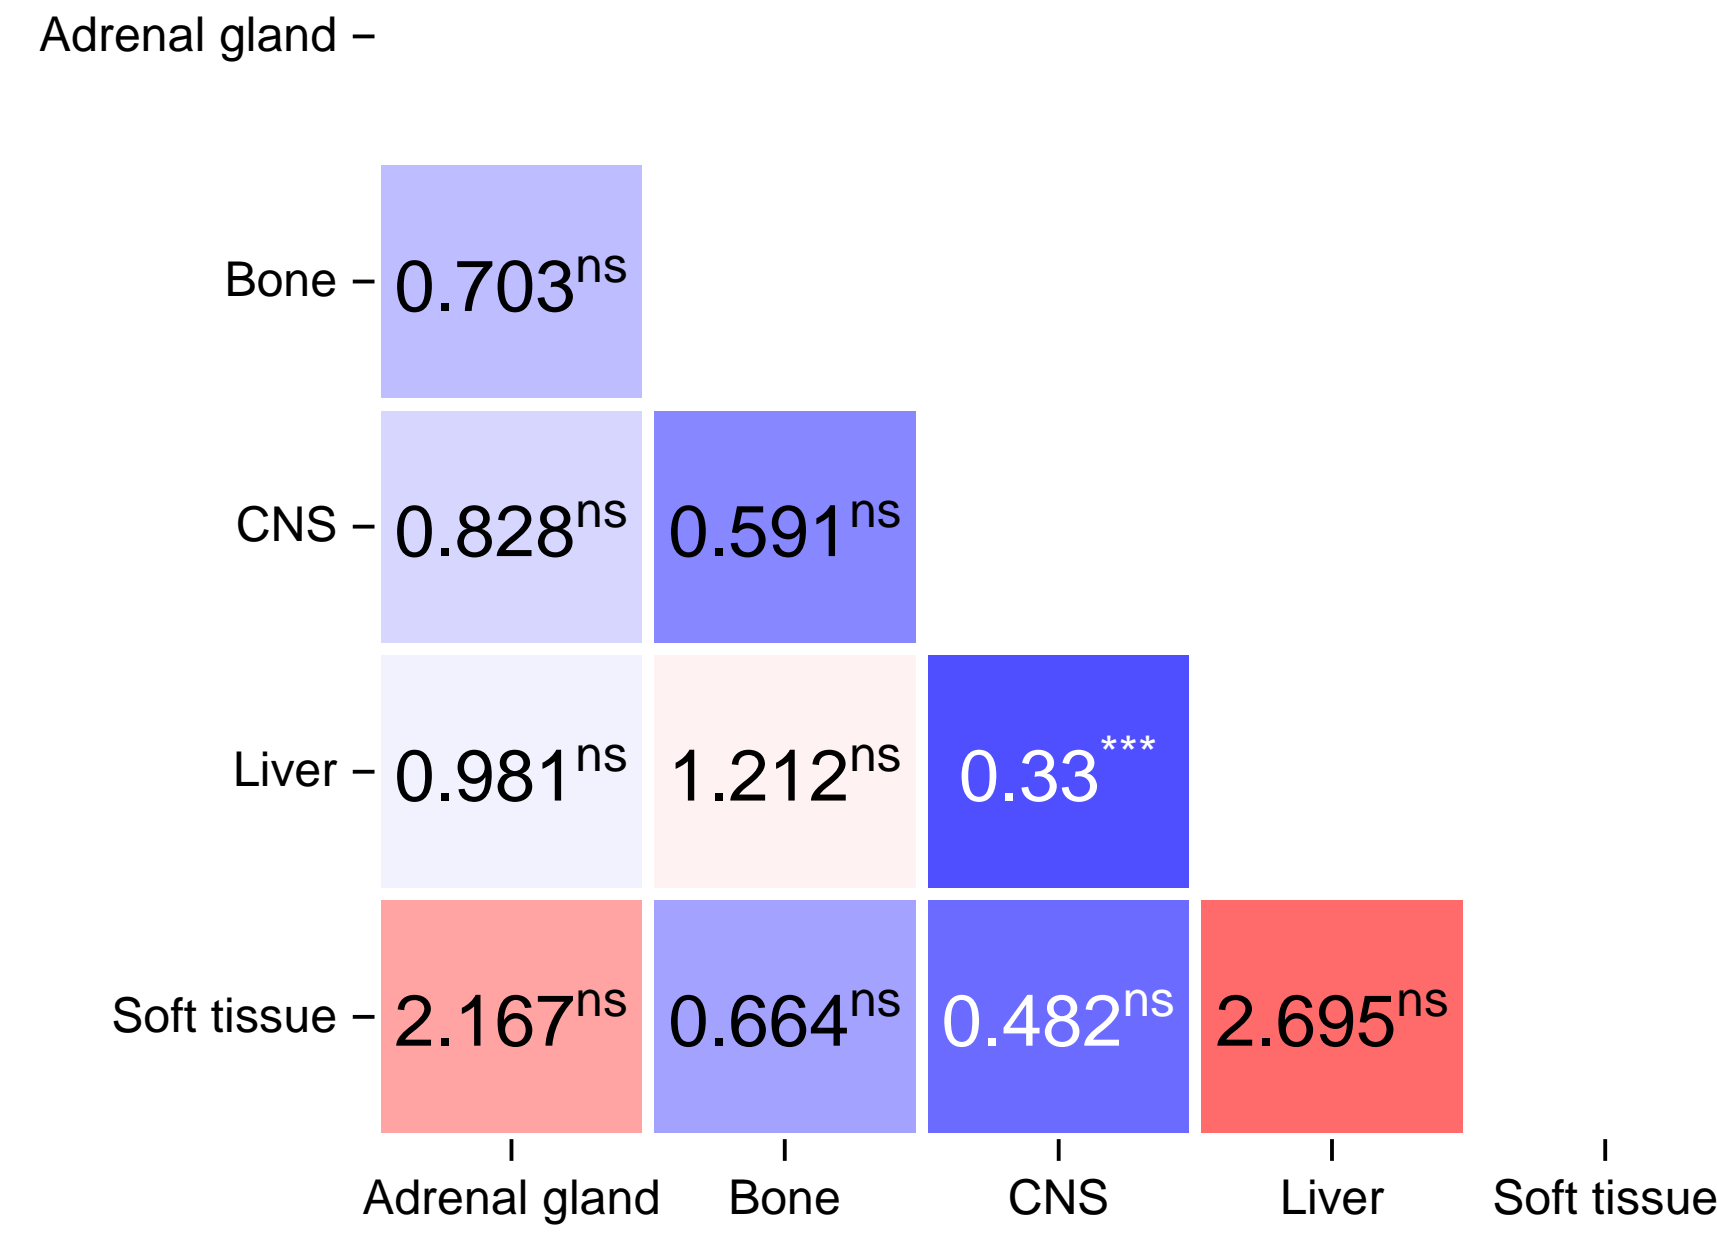

Total

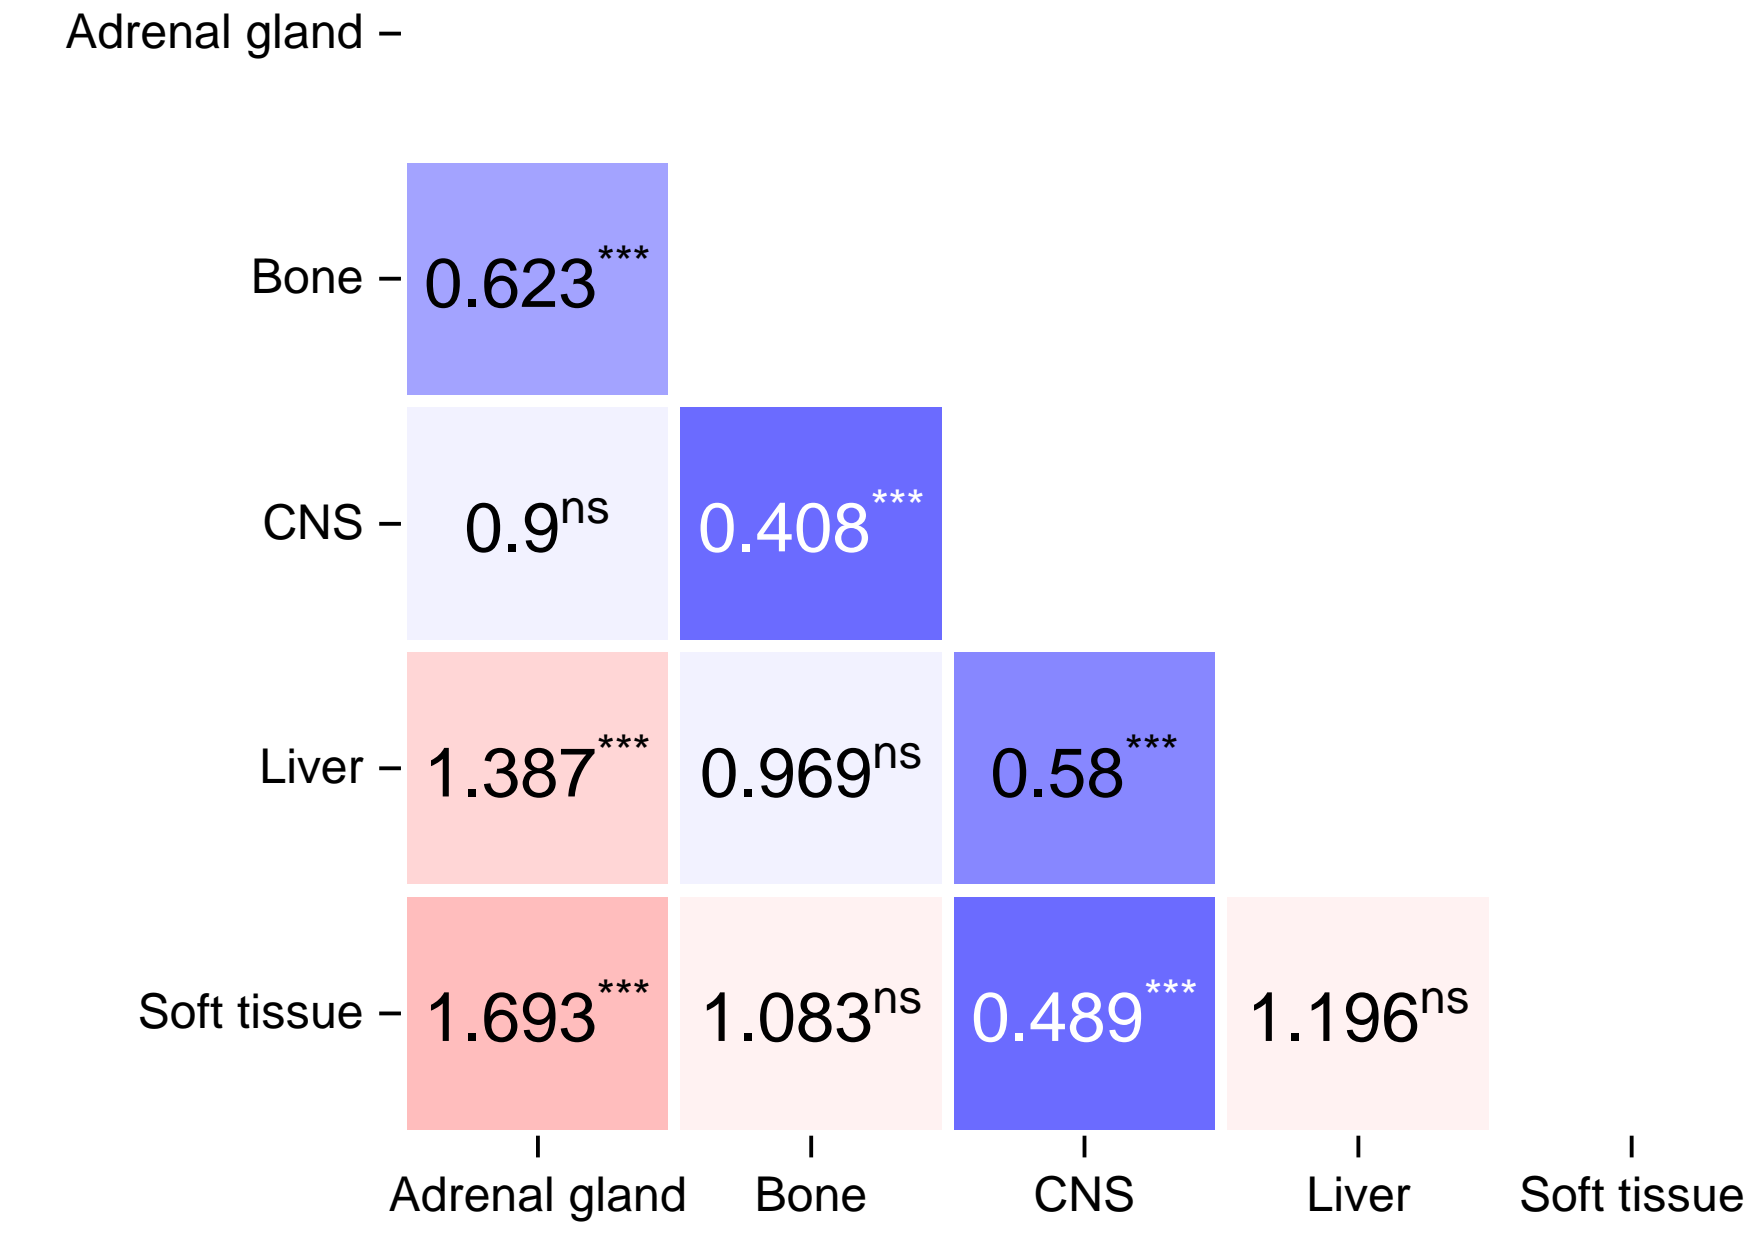

Odds ratio

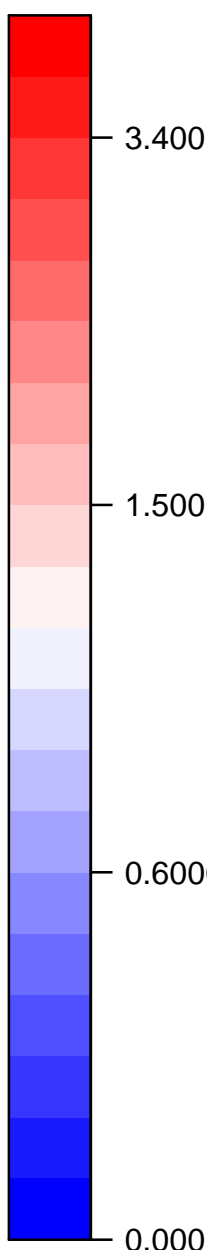

Supplement: s1 [file Figure S1.pdf › Figure S1.pdf]
